# Supplementary material for: Worse cardiovascular and renal outcome in male SLE patients: First sex study from the Swiss SLE Cohort Study
Source: Research Square preprint supplement (doi:10.21203/rs.3.rs-645732/v2), 2021-12-21
Supplement: Supplementary file 6 [file e6f58716a8cc749ae2418f58.docx]

Suppelemtary table 2: logistic regression for any dermatological manifestations of SLE

|  | OR | 95%-CI | p-value |
| --- | --- | --- | --- |
| Gender | 0.510 | 0.318 – 0.819 | 0.005 |
| disease duration | 1.022 | 0.998 – 1.047 | 0.072 |
| constant | 2.645 |  | <0.001 |

Tables of estimates of multiple logistical regression models for dermatological manifestations of SLE. The model includes sex (male=1, female=0) and disease duration at inclusion in years. OR = odds ratio, 95%-CI = 95% confidence interval.
